# Supplementary material for: Assessment of Insulin-related Knowledge among Healthcare Professionals in a Large Teaching Hospital in the United Kingdom
Source: Pharmacy (Basel). 2019 Jan 30;7(1):16. doi: 10.3390/pharmacy7010016 (PMC6473239; doi:10.3390/pharmacy7010016)
Supplement: Supplementary file 1 [file pharmacy-07-00016-s001.pdf]

|                                                                                                                              |                                                                                                                           |
|------------------------------------------------------------------------------------------------------------------------------|---------------------------------------------------------------------------------------------------------------------------|
| 1. What is your profession?                                                                                                  | 9. Levemir (detemir) is:                                                                                                  |
| a) Hospital pharmacist                                                                                                       | a) A rapid acting insulin                                                                                                 |
| b) Junior Doctor                                                                                                             | b) An intermediate-acting insulin                                                                                         |
| c) Consultant                                                                                                                | c) A long-acting insulin                                                                                                  |
| d) Pharmacy technician                                                                                                       | d) A short-acting insulin                                                                                                 |
| e) Nurse                                                                                                                     | e) I don't know                                                                                                           |
| f) Other (please state):                                                                                                     |                                                                                                                           |
| 2. How many years have you worked in this profession?                                                                        | 10. Which of the following is a basal (long-acting) insulin? (Select one or more answers)                                 |
| 3. In what clinical area are you currently working?                                                                          | a) Apidra                                                                                                                 |
| 4. How confident are you about your knowledge of insulin products?                                                           | b) NovoMix 30                                                                                                             |
| a) Very confident                                                                                                            | c) Actrapid                                                                                                               |
| b) Confident                                                                                                                 | d) Lantus (glargine)                                                                                                      |
| c) Slightly confident                                                                                                        | e) I don't know                                                                                                           |
| d) Not at all confident                                                                                                      |                                                                                                                           |
| 5. How confident are you about your knowledge of insulin dosage regimens?                                                    | 11. What is the duration of action for NovoMix 30?                                                                        |
| a) Very confident                                                                                                            | a) 30 minutes                                                                                                             |
| b) Confident                                                                                                                 | b) 3-5 hours                                                                                                              |
| c) Slightly confident                                                                                                        | c) 6-8 hours                                                                                                              |
| d) Not at all confident                                                                                                      | d) 16-24 hours                                                                                                            |
|                                                                                                                              | e) I don't know                                                                                                           |
| 6. Which of the following insulins is recommended to be administered 15 minutes prior to meals? (Select one or more answers) | 12. Subcutaneous (SC) Actrapid should not be administered at intervals less than:                                         |
| a) Humulin M3                                                                                                                | a) 4 hours                                                                                                                |
| b) NovoRapid                                                                                                                 | b) 3 hours                                                                                                                |
| c) Humalog                                                                                                                   | c) 2 hours                                                                                                                |
| d) Humulin S                                                                                                                 | d) 1 hour                                                                                                                 |
| e) I don't know                                                                                                              | e) I don't know                                                                                                           |
| 7. Which of the following insulins are to be administered at mealtimes? (Select one or more answers)                         | 13. Which of the following insulin products contain 100units/mL? (Select one or more answers)                             |
| a) Levemir                                                                                                                   | a) Humulin S                                                                                                              |
| b) Humulin S                                                                                                                 | b) Lantus                                                                                                                 |
| c) Humalog                                                                                                                   | c) Toujeo                                                                                                                 |
| d) Humulin M3                                                                                                                | d) NovoRapid                                                                                                              |
| e) I don't know                                                                                                              | e) I don't know                                                                                                           |
| 8. Which insulin preparation should never be given at night? (Select one or more answers)                                    | 14. Have you ever identified, or been involved in, an insulin prescription, administration or management error/near miss? |
| a) Humalog Mix50                                                                                                             | a) Yes                                                                                                                    |
| b) Apidra                                                                                                                    | b) No                                                                                                                     |
| c) NovoRapid                                                                                                                 |                                                                                                                           |
| d) Humulin S                                                                                                                 | 15. If so, please give details.                                                                                           |
| e) I don't know                                                                                                              | 16. What would you suggest needs to be done to improve insulin safety in hospitals?                                       |

**Figure S1.** Insulin questionnaire distributed to healthcare professionals. Correct answers are highlighted.
